# Supplementary material for: Upregulation of ica Operon Governs Biofilm Formation by a Coagulase-Negative Staphylococcus caprae
Source: MDPI journal article supplement (doi:10.3390/microorganisms11061533), 2023-06-09

Supplementary Material for manuscript titled:

# Upregulation of *ica* Operon Governs Biofilm Formation by a Coagulase-Negative *Staphylococcus caprae*

Hilla Oknin <sup>1,2</sup>, Yulia Kroupitski <sup>1</sup>, Moshe Shemesh <sup>1,\*</sup> and Shlomo Blum <sup>2,\*</sup>

<sup>1</sup> Institute for Postharvest Technology and Food Sciences, Department of Food Science, Agricultural Research Organization, Volcani Institute, Rishon LeZion 7505101, Israel

<sup>2</sup> Department of Bacteriology and Mycology, Kimron Veterinary Institute, Rishon LeZion 7534503, Israel

\* Correspondence: moshesh@agri.gov.il (M.S.); shlomobl@moag.gov.il (S.B.)

**Supplementary Figure S1:** Cryo-SEM imaging of surfaced adhered biofilm formation by *S. caprae* following 24h incubation.

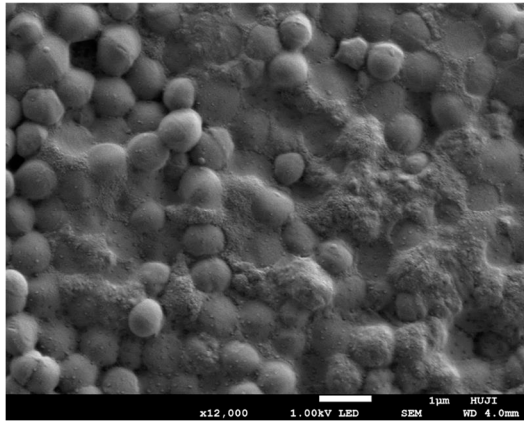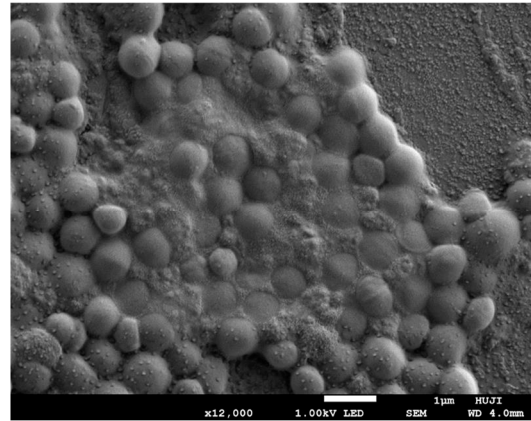

Supplement: s1 [file s1]
